# Supplementary material for: Horizontal transfer generates genetic variation in an asexual pathogen
Source: PubMed Central journal article supplement (PMC4217194; doi:10.7717/peerj.650), 2014-10-30
Supplement: peerj-02-650-s001.pdf [file peerj-02-650-s001.pdf]

Supplemental Table S 1: 60 Common type 2 SNPs in strains DVD-3, DVD-31, DVD-161 and DVD-s94

| VdLs17 supercontig | Position | REF allele | ALT allele |
|--------------------|----------|------------|------------|
| Supercontig1.8     | 733056   | A          | G          |
| Supercontig1.8     | 733428   | C          | T          |
| Supercontig1.8     | 734056   | C          | T          |
| Supercontig1.8     | 734471   | T          | C          |
| Supercontig1.8     | 734476   | G          | A          |
| Supercontig1.8     | 734599   | G          | A          |
| Supercontig1.8     | 737029   | C          | A          |
| Supercontig1.8     | 737093   | C          | T          |
| Supercontig1.8     | 1056983  | C          | T          |
| Supercontig1.8     | 1057302  | G          | A          |
| Supercontig1.9     | 614488   | G          | C          |
| Supercontig1.9     | 615586   | G          | A          |
| Supercontig1.9     | 615747   | A          | G          |
| Supercontig1.9     | 616120   | G          | A          |
| Supercontig1.9     | 1040049  | C          | T          |
| Supercontig1.9     | 1041375  | C          | G          |
| Supercontig1.9     | 1168734  | A          | G          |
| Supercontig1.9     | 1169722  | T          | C          |
| Supercontig1.9     | 1170155  | G          | A          |
| Supercontig1.9     | 1170336  | C          | T          |

|                |         |   |   |
|----------------|---------|---|---|
| Supercontig1.9 | 1170455 | C | T |
| Supercontig1.9 | 1170606 | C | T |
| Supercontig1.9 | 1170827 | C | T |
| Supercontig1.9 | 1171551 | C | T |
| Supercontig1.9 | 1172003 | C | T |
| Supercontig1.9 | 1172039 | C | T |
| Supercontig1.9 | 1172128 | C | T |
| Supercontig1.9 | 1175318 | C | T |
| Supercontig1.9 | 1175597 | G | C |
| Supercontig1.9 | 1175859 | A | T |
| Supercontig1.9 | 1176233 | T | C |
| Supercontig1.9 | 1176250 | T | G |
| Supercontig1.9 | 1176271 | T | C |
| Supercontig1.9 | 1176939 | C | T |
| Supercontig1.9 | 1177851 | A | T |
| Supercontig1.9 | 1179547 | T | C |
| Supercontig1.9 | 1181721 | A | G |
| Supercontig1.9 | 1182314 | G | A |
| Supercontig1.9 | 1183438 | G | T |
| Supercontig1.9 | 1185255 | C | T |

|                |         |   |   |
|----------------|---------|---|---|
| Supercontig1.9 | 1186010 | A | G |
| Supercontig1.9 | 1186019 | G | A |
| Supercontig1.9 | 1186555 | T | G |
| Supercontig1.9 | 1187295 | C | T |
| Supercontig1.9 | 1187367 | A | T |
| Supercontig1.9 | 1187368 | G | A |
| Supercontig1.9 | 1187548 | C | A |
| Supercontig1.9 | 1188805 | T | A |
| Supercontig1.9 | 1189251 | C | G |
| Supercontig1.9 | 1189970 | T | C |
| Supercontig1.9 | 1190047 | G | A |
| Supercontig1.9 | 1190872 | A | T |
| Supercontig1.9 | 1190909 | G | A |
| Supercontig1.9 | 1190983 | C | T |
| Supercontig1.9 | 1191327 | T | C |
| Supercontig1.9 | 1191388 | C | G |
| Supercontig1.9 | 1207938 | G | A |
| Supercontig1.9 | 1207967 | G | A |
| Supercontig1.9 | 1208061 | G | A |
| Supercontig1.9 | 1208190 | G | A |

---
